# Supplementary material for: Food Monitoring: Limitations of Accelerated Storage to Predict Molecular Changes in Hazelnuts (Corylus avellana L.) under Realistic Conditions Using UPLC-ESI-IM-QTOF-MS
Source: MDPI journal article supplement (doi:10.3390/metabo13101031), 2023-09-25
Supplement: s1 [file s1]

Supporting Information

# Food Monitoring: Limitations of Accelerated Storage to Predict Molecular Changes in Hazelnuts (*Corylus avellana* L.) under Realistic Conditions Using UPLC-ESI-IM-QTOF-MS

Henri Loesel <sup>1</sup>, Navid Shakiba <sup>1,2</sup>, Soeren Wenck <sup>1</sup>, Phat Le Tan <sup>1</sup>, Tim-Oliver Karstens <sup>1</sup>, Marina Creydt <sup>1</sup>, Stephan Seifert <sup>1</sup>, Thomas Hackl <sup>1,2</sup> and Markus Fischer <sup>1,\*</sup>

<sup>1</sup> Hamburg School of Food Science, Institute of Food Chemistry, University of Hamburg, Grindelallee 117, 20146 Hamburg, Germany; henri.loesel@uni-hamburg.de (H.L.); navid.shakiba@uni-hamburg.de (N.S.); soeren.wenck@uni-hamburg.de (S.W.); phat.le.tan@studium.uni-hamburg.de (P.L.T.); tim-oliver.karstens@studium.uni-hamburg.de (T.-O.K.); marina.creydt@uni-hamburg.de (M.C.); stephan.seifert@uni-hamburg.de (S.S.); thomas.hackl@uni-hamburg.de (T.H.)

<sup>2</sup> Institute of Organic Chemistry, University of Hamburg, Martin-Luther-King-Platz 6, 20146 Hamburg, Germany

\* Correspondence: markus.fischer@uni-hamburg.de; Tel.: +49-40-42838-4359

## Supplementary Figures

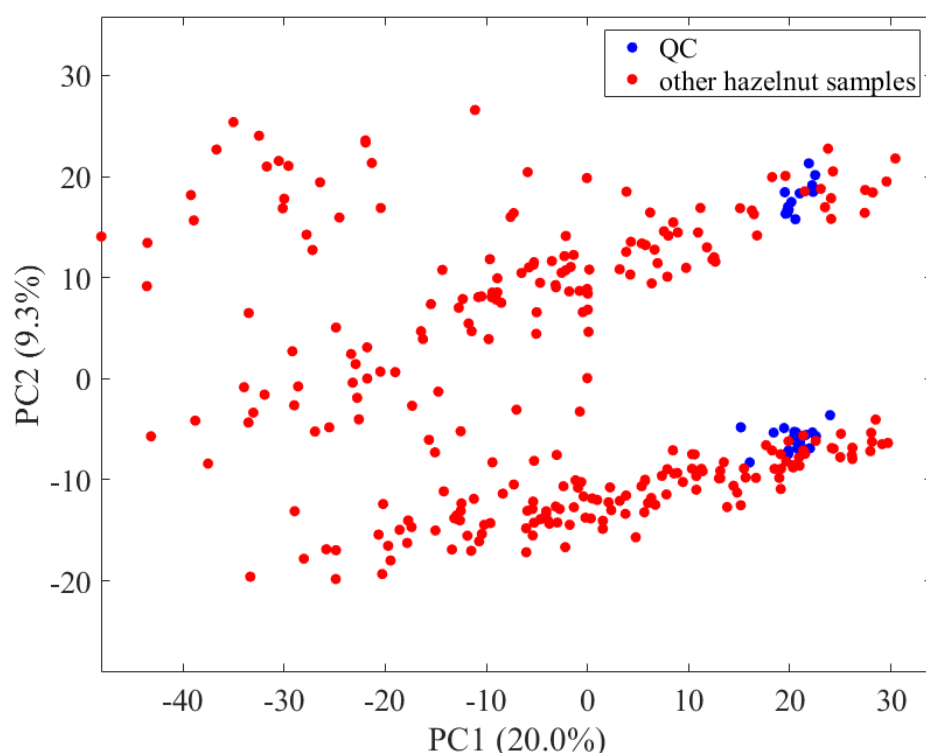

**Figure S1.** Scores of the principal component analysis depicted according to distinguish the quality control (QC) samples from the others. The data was previously vector normalized and autoscaled together regarding the two batches.

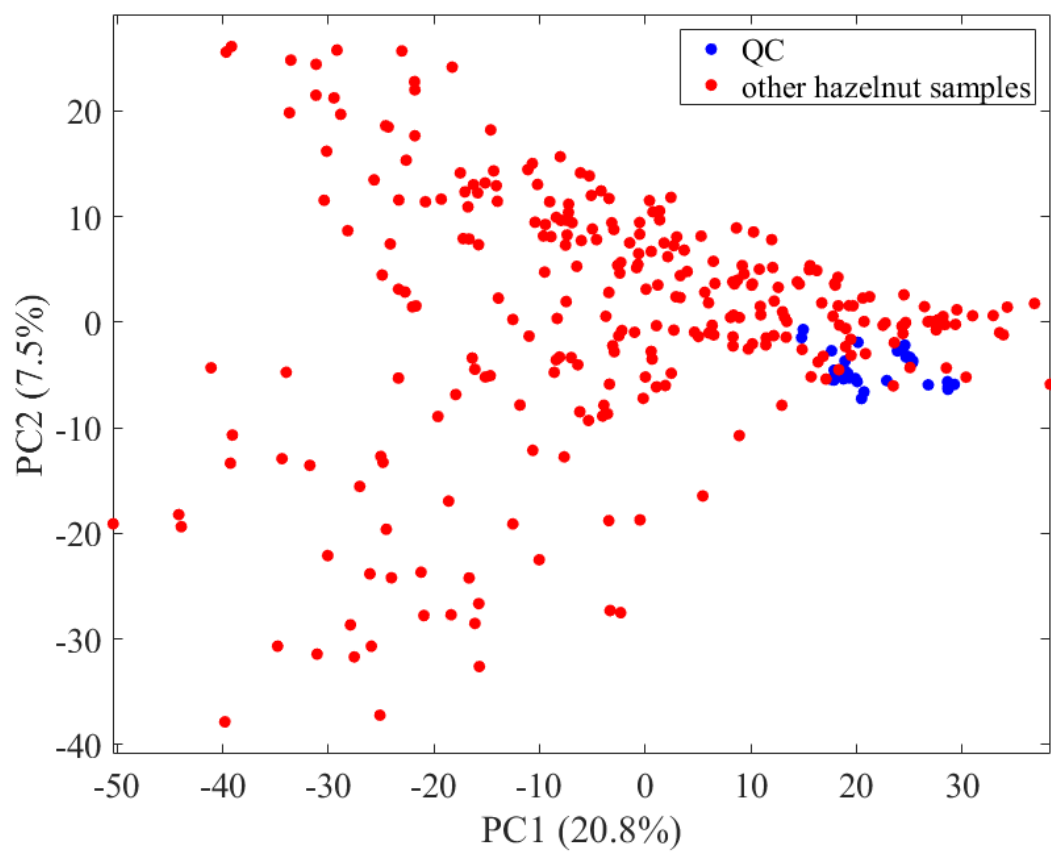

**Figure S2.** Scores of the principal component analysis depicted according to distinguish the quality control (QC) samples from the others. The data was previously vector normalized and autoscaled separately regarding the two batches..

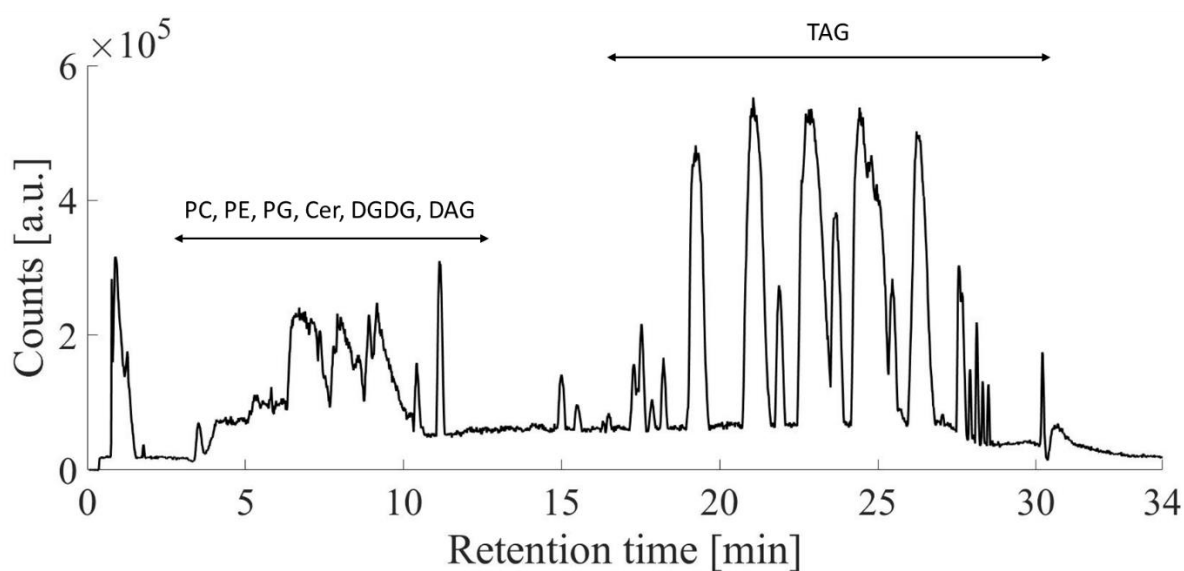

**Figure S3.** Exemplary TIC of a hazelnut sample with the following assignments of the main substance classes: PC: phosphocholine, PE: phosphoethanolamine, PG: phosphoglycerol, Cer: ceramide, DGDG: digalactosyldiacylglyceride, DAG: diacylglyceride, TAG: triacylglyceride.

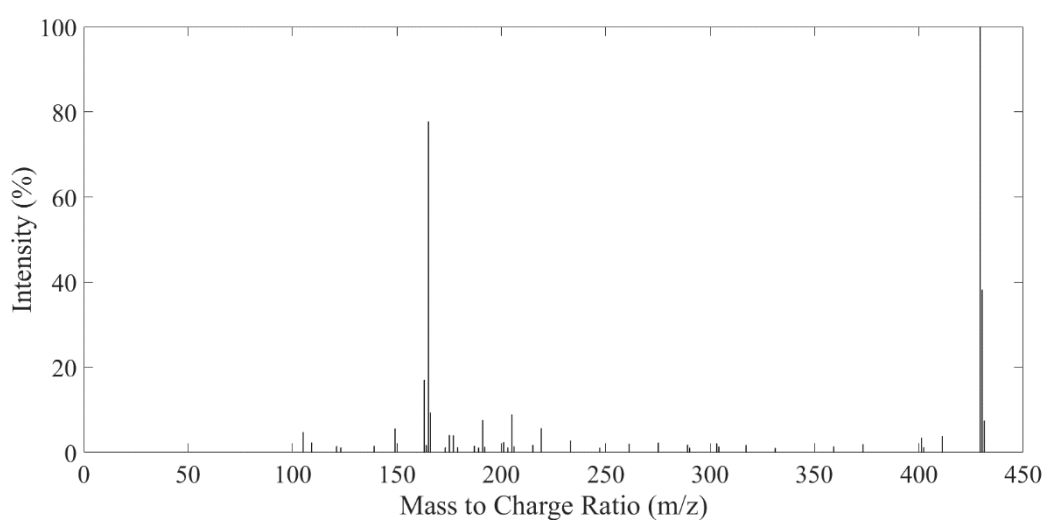

**Figure S4.** MS/MS spectrum of the metabolite, which was identified as  $\alpha$ -tocomonenol. The collision energy was 10 eV.

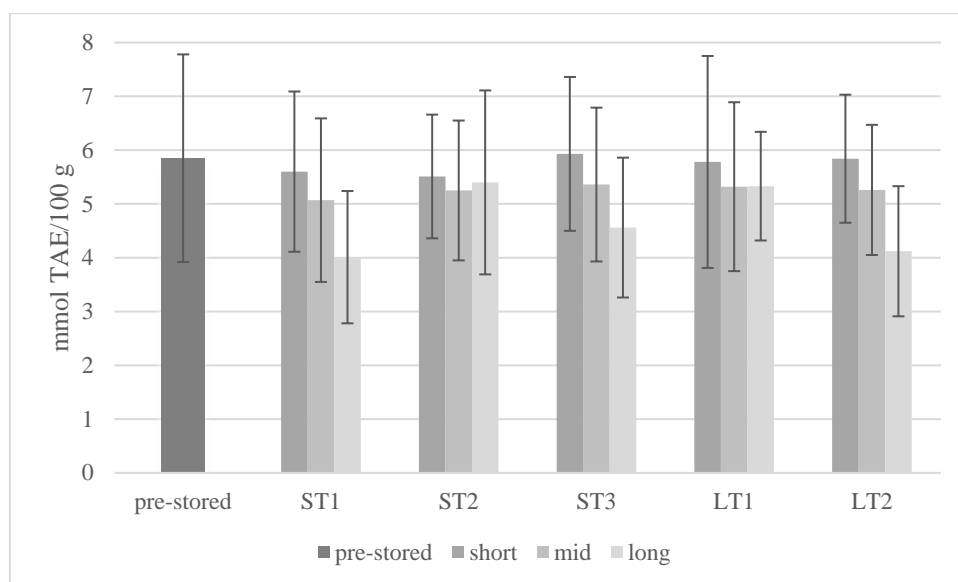

**Figure S5.** Bar graph of the results of the TEAC assay. The storage durations of accelerated short-term storage were summarized as follows: short (day 2, day 4, week 2), mid (week 6, week 10, week 12), and long (week 16, week 20, week 24). The storage periods of realistic long-term storage were summarized as follows: short (month 3, month 6), mid (month 9, month 12), and long (month 15, month 18).

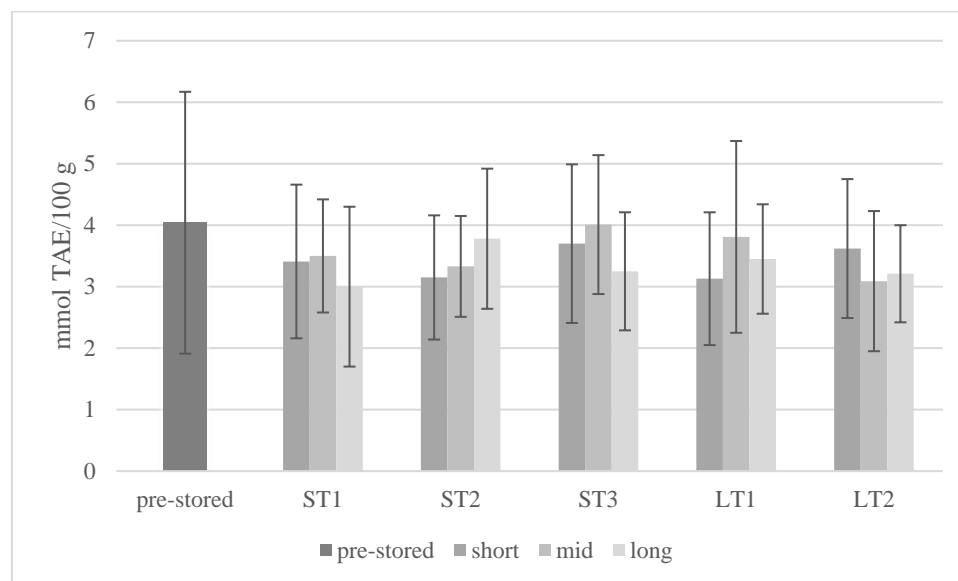

**Figure S6.** Bar graph of the results of the ORAC assay. The storage durations of accelerated short-term storage were summarized as follows: short (day 2, day 4, week 2), mid (week 6, week 10, week 12), and long (week 16, week 20, week 24). The storage periods of realistic long-term storage were summarized as follows: short (month 3, month 6), mid (month 9, month 12), and long (month 15, month 18).

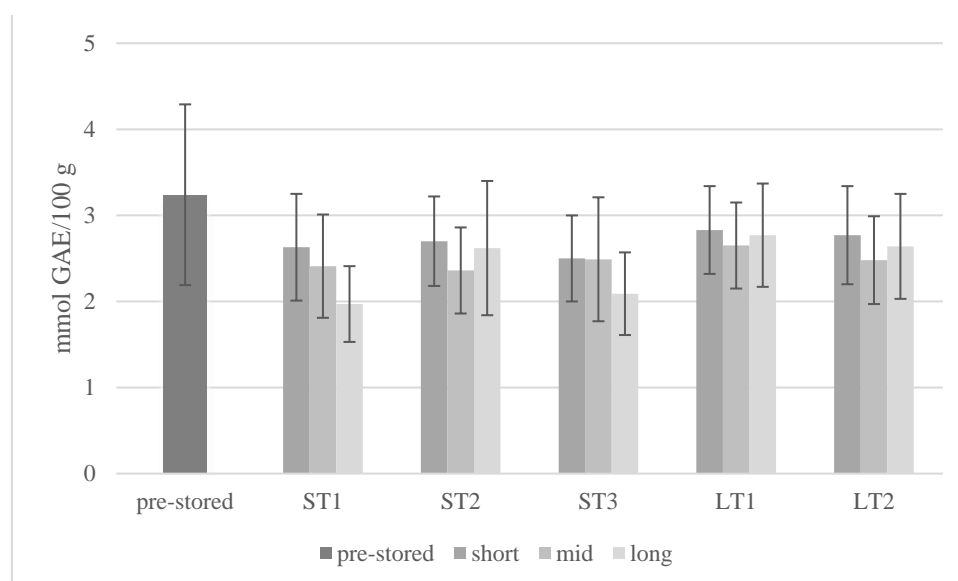

**Figure S7.** Bar graph of the results of the FOLIN-CIOCALTEU assay. The storage durations of accelerated short-term storage were summarized as follows: short (day 2, day 4, week 2), mid (week 6, week 10, week 12), and long (week 16, week 20, week 24). The storage periods of realistic long-term storage were summarized as follows: short (month 3, month 6), mid (month 9, month 12), and long (month 15, month 18).

## Supplementary Tables

**Table S1.** Overview about the metadata of the stored hazelnut samples.

| Sample-ID | Variety | Harvest year | Origin | Diameter [mm] |
|-----------|---------|--------------|--------|---------------|
| 1         | Mixture | 2018         | Turkey | 11 – 13       |
| 2         | Mixture | 2019         | Turkey | 11 – 13       |
| 3         | Tombul  | 2018         | Turkey | 13 – 15       |
| 4         | Mixture | 2019         | Turkey | 13 – 15       |

|   |         |      |        |     |
|---|---------|------|--------|-----|
| 5 | Mixture | 2018 | Turkey | >14 |
| 6 | Mixture | 2019 | Turkey | >14 |

**Table S2.** Overview about the chosen storage durations.

| ST1 – ST3 (weeks) | LT1 and LT2 (months) |
|-------------------|----------------------|
| 2 days            | 3                    |
| 4 days            | 6                    |
| 2                 | 9                    |
| 4                 | 12                   |
| 6                 | 15                   |
| 8                 | 18                   |
| 10                |                      |
| 12                |                      |
| 16                |                      |
| 20                |                      |
| 24                |                      |

**Table S3.** Results of the classification of pre- and post-storage samples (post storage is defined by accelerated short-term storage  $\geq 12$  weeks and realistic long-term storage:  $\geq 12$  months; T<sub>0</sub>: pre-storage, M<sub>12</sub>: 12 months). The Sample-ID column shows which sample was not included in the training set and was subsequently classified using the trained model.

|     | Sample-ID                                         | 1              | 2               | 3              | 4              | 5              | 6              |
|-----|---------------------------------------------------|----------------|-----------------|----------------|----------------|----------------|----------------|
| ST1 | Training accuracy [%]                             | 100            | 100             | 96             | 96             | 96             | 100            |
|     | Validation [Amount of correct classified samples] | 5/5            | 5/5             | 5/5            | 5/5            | 5/5            | 5/5            |
|     | Validation [Misclassified samples]                | /              | /               | /              | /              | /              | /              |
| ST2 | Training accuracy [%]                             | 72             | 80              | 80             | 80             | 80             | 84             |
|     | Validation [Amount of correct classified samples] | 4/5            | 4/5             | 4/5            | 4/5            | 4/5            | 5/5            |
|     | Validation [Misclassified samples]                | T <sub>0</sub> | T <sub>0</sub>  | T <sub>0</sub> | T <sub>0</sub> | T <sub>0</sub> | /              |
| ST3 | Training accuracy [%]                             | 96             | 96              | 96             | 92             | 92             | 96             |
|     | Validation [Amount of correct classified samples] | 4/5            | 5/5             | 5/5            | 5/5            | 5/5            | 5/5            |
|     | Validation [Misclassified samples]                | T <sub>0</sub> | /               | /              | /              | /              | /              |
| LT1 | Training accuracy [%]                             | 75             | 75              | 80             | 80             | 75             | 80             |
|     | Validation [Amount of correct classified samples] | 3/4            | 3/4             | 3/4            | 3/4            | 3/4            | 3/4            |
|     | Validation [Misclassified samples]                | T <sub>0</sub> | M <sub>12</sub> | T <sub>0</sub> | T <sub>0</sub> | T <sub>0</sub> | T <sub>0</sub> |
| LT2 | Training accuracy [%]                             | 85             | 90              | 85             | 85             | 90             | 90             |
|     | Validation [Amount of correct classified samples] | 3/4            | 4/4             | 3/4            | 4/4            | 3/4            | 4/4            |
|     | Validation [Misclassified samples]                | T <sub>0</sub> | /               | T <sub>0</sub> | /              | T <sub>0</sub> | /              |

## Identification parameters

Phosphocholines were identified via the fragment at  $m/z$  184 formed by cleavage of the polar head group. The corresponding  $[M+H-183]^+$ -fragment, on the other hand, showed only low intensity. The fatty acids were determined by difference calculation.

The characteristic fragment of phosphoethanolamines was the ion  $[M+H-141]^+$ , which was formed by the cleavage of the polar head group. The fragment formed was the diacylglyceride and subsequently cleaved off a fatty acid, which made it possible to obtain information about the fatty acids it contained.

Phosphoglycerols were identified by the fragment of the polar head group at  $m/z$  195, and fatty acids were determined by difference calculation.

Identification of ceramides based on fragment spectra was performed analogously to another study. The most intense signal in the fragmentation spectra showed a signal corresponding to the phytosphingosine moiety ( $m/z$  326 or 324) formed after cleavage of the amide bond.

Fragment spectra of digalactosyldiacylglycerides revealed  $[M+Na-162]^+$  fragments formed by cleavage of a galactosyl unit. Other fragments are formed when the monogalactosyl fragment cleaves off a fatty acid. In addition, fatty acids are cleaved directly from the molecular ion.

Oxidized lipids were identified by MS/MS spectra according to previous studies, where the mechanisms of formation and fragmentation were also described in detail. The epoxides were identified by the fragments of the diacylglycerides, which have an  $m/z$  +14 compared to the corresponding unoxidized diacylglyceride. This difference results from the addition of one oxygen atom and the abstraction of two hydrogen atoms.

Triacylglycerides were identified based on the fragments that result from the cleavage of a fatty acid and the neutral loss of this fatty acid. In addition,  $[RCOO + 58]^+$  fragments were used for structure elucidation.

**Table S4.** Summary of identification parameters of marker compounds that are affected by storage.

| Tentative metabolite | Storage condition | Sum formula                                       | Ion | $m/z$ (analytical) | $m/z$ (calculated) | $m/z$ difference [ppm] | RT [min] | DT [ms] | CCS-value [analytical, Å <sup>2</sup> ] | CCS-value [LipidCCS database, Å <sup>2</sup> ] | CCS-value [difference, %] | Main fragments [ $m/z$ ]                     |
|----------------------|-------------------|---------------------------------------------------|-----|--------------------|--------------------|------------------------|----------|---------|-----------------------------------------|------------------------------------------------|---------------------------|----------------------------------------------|
| PC (0:0/0:0)         | ST1               | C <sub>8</sub> H <sub>20</sub> NO <sub>6</sub> P  | +H  | 258.1104           | 258.1101           | 1.17                   | 0.84     | 19.166  | 156.04                                  | no entry                                       | /                         | 184.0733<br>104.1071                         |
| $\alpha$ -tocomonol  | ST1               | C <sub>29</sub> H <sub>48</sub> O <sub>2</sub>    | +H  | 429.3733           | 429.3727           | 1.38                   | 8.47     | 26.790  | 214.62                                  | no entry                                       | /                         | 205.1219<br>165.091                          |
| PC (16:0/0:0)        | ST1               | C <sub>24</sub> H <sub>50</sub> NO <sub>7</sub> P | +H  | 496.3408           | 496.3398           | 2.09                   | 3.41     | 28.721  | 229.28                                  | 230.5                                          | 0.53                      | 184.0733<br>104.1072                         |
| PC (18:2/0:0)        | ST1               | C <sub>26</sub> H <sub>50</sub> NO <sub>7</sub> P | +H  | 520.3408           | 520.398            | 1.99                   | 2.65     | 28.468  | 226.96                                  | 229.7                                          | 1.19                      | 184.0732<br>104.1073                         |
| PC (18:1/0:0)        | ST1               | C <sub>26</sub> H <sub>52</sub> NO <sub>7</sub> P | +H  | 522.3566           | 522.3554           | 2.27                   | 3.55     | 29.125  | 232.23                                  | 232.7                                          | 0.20                      | 184.0735<br>104.1071                         |
| Cer (d36:3)          | ST1               | C <sub>36</sub> H <sub>67</sub> NO <sub>3</sub>   | +H  | 562.5194           | 562.5194           | 0.05                   | 8.21     | 32.086  | 255.57                                  | 254.6 [Cer (d18:2/18:1)]                       | /                         | 324.2905<br>306.2794<br>300.2902<br>282.2794 |

| LipidCCS             |                   |                                                  |                  |                    |                    |                        |          |         |                                         |                                                |                           |                          |          |
|----------------------|-------------------|--------------------------------------------------|------------------|--------------------|--------------------|------------------------|----------|---------|-----------------------------------------|------------------------------------------------|---------------------------|--------------------------|----------|
| Tentative metabolite | Storage condition | Sum formula                                      | Ion              | $m/z$ (analytical) | $m/z$ (calculated) | $m/z$ difference [ppm] | RT [min] | DT [ms] | CCS-value [analytical, Å <sup>2</sup> ] | CCS-value [LipidCCS database, Å <sup>2</sup> ] | CCS-value [difference, %] | Main fragments [ $m/z$ ] |          |
| Cer (d36:2)          | ST1               | C <sub>36</sub> H <sub>69</sub> NO <sub>3</sub>  | +H               | 564.5361           | 564.535            | 1.91                   | 9.45     | 32.266  | 257                                     | 258.6 [Cer (d18:1/18:1)]                       | /                         | 326.3058                 | 308.2956 |
|                      |                   |                                                  |                  |                    |                    |                        |          |         |                                         |                                                |                           | 300.2898                 | 282.2798 |
| Cer (d38:4)          | ST1               | C <sub>38</sub> H <sub>69</sub> NO <sub>3</sub>  | +H               | 588.5363           | 588.535            | 2.18                   | 8.28     | 32.430  | 258.07                                  | no entry                                       | /                         | 324.2903                 | 306.2792 |
| Cer (d38:3)          | ST1               | C <sub>38</sub> H <sub>71</sub> NO <sub>3</sub>  | +H               | 590.5519           | 590.5507           | 2.08                   | 9.54     | 32.738  | 260.52                                  | 261.2 [Cer (d18:2/20:1)]                       | /                         | 326.306                  | 308.2954 |
| DAG (18:3/18:1/0:0)  | ST1               | C <sub>39</sub> H <sub>68</sub> O <sub>5</sub>   | +H               | 617.5153           | 617.514            | 2.19                   | 5.62     | 32.661  | 259.64                                  | 259.9                                          | 0.10                      | 599.5038                 | 339.2902 |
|                      |                   |                                                  |                  |                    |                    |                        |          |         |                                         |                                                |                           | 335.2592                 |          |
| DAG (18:0/18:3/0:0)  | ST1, ST3          | C <sub>39</sub> H <sub>70</sub> O <sub>5</sub>   | +H               | 619.5313           | 619.5296           | 2.75                   | 6.94     | 33.523  | 266.53                                  | 264.6                                          | -0.73                     | 341.3056                 | 335.2589 |
| TAG (18:1/18:1/2:0)  | ST3               | C <sub>41</sub> H <sub>74</sub> O <sub>6</sub>   | +NH <sub>4</sub> | 680.5859           | 680.5824           | 5.33                   | 11.1     | 34.361  | 272.7                                   | no entry                                       | /                         | 663.5579                 | 603.5361 |
|                      |                   |                                                  |                  |                    |                    |                        |          |         |                                         |                                                |                           | 381.3011                 | 339.2898 |
| PE (18:2/18:2)       | ST1               | C <sub>41</sub> H <sub>74</sub> NO <sub>8P</sub> | +H               | 740.5242           | 740.5225           | 2.32                   | 6.82     | 34.529  | 273.61                                  | 276.0                                          | 0.87                      | 599.5044                 | 337.2742 |
| PE (18:2/18:1)       | ST1               | C <sub>41</sub> H <sub>76</sub> NO <sub>8P</sub> | +H               | 742.5406           | 742.5381           | 3.33                   | 7.72     | 34.875  | 276.36                                  | 278.1                                          | 0.63                      | 601.5207                 | 339.2893 |
|                      |                   |                                                  |                  |                    |                    |                        |          |         |                                         |                                                |                           | 337.2736                 |          |
| PE (18:1/18:1)       | ST1               | C <sub>41</sub> H <sub>78</sub> NO <sub>8P</sub> | +H               | 744.5562           | 744.5538           | 3.25                   | 8.84     | 35.185  | 278.82                                  | 281.5                                          | 0.95                      | 603.5364                 | 339.2911 |
| PG (36:5)            | ST1               | C <sub>42</sub> H <sub>73</sub> O <sub>10P</sub> | +H               | 769.5017           | 769.5014           | 0.38                   | 4.03     | 35.320  | 279.74                                  | 281.6 [PG (18:2/18:3)]                         | /                         | 597.4869                 | 195.0026 |
| PC (36:4)            | ST1               | C <sub>44</sub> H <sub>80</sub> NO <sub>8P</sub> | +H               | 782.5729           | 782.5694           | 4.44                   | 7.34     | 36.074  | 285.66                                  | 285.4 [PC (18:2/18:2)]                         | /                         | 184.0731                 |          |
| TAG (18:2/18:1/12:0) | ST1               | C <sub>51</sub> H <sub>92</sub> O <sub>6</sub>   | +NH <sub>4</sub> | 818.726            | 818.7259           | 3.48                   | 18.82    | 38.493  | 304.72                                  | 305.8                                          | 0.35                      | 601.5203                 | 521.4572 |
|                      |                   |                                                  |                  |                    |                    |                        |          |         |                                         |                                                |                           | 519.4416                 |          |
| TAG (18:2/18:2/16:1) | ST1               | C <sub>55</sub> H <sub>96</sub> O <sub>6</sub>   | +NH <sub>4</sub> | 870.757            | 870.7545           | 2.91                   | 18.88    | 39.657  | 313.68                                  | 314.5                                          | 0.26                      | 599.5049                 | 573.4898 |
| TAG (18:2/16:1/20:5) | ST1, ST3          | C <sub>57</sub> H <sub>94</sub> O <sub>6</sub>   | +H               | 875.7133           | 875.7123           | 1.12                   | 18.85    | 39.562  | 312.9                                   | 316.3                                          | 1.07                      | 621.4848                 | 595.4694 |
|                      |                   |                                                  |                  |                    |                    |                        |          |         |                                         |                                                |                           | 573.4892                 |          |
| TAG (18:1/18:1/16:0) | ST1               | C <sub>55</sub> H <sub>102</sub> O <sub>6</sub>  | +NH <sub>4</sub> | 876.8046           | 876.8015           | 3.65                   | 24.72    | 40.550  | 320.76                                  | 319.3                                          | -0.46                     | 603.5367                 | 577.5215 |

| Tentative metabolite     | Storage condition | Sum formula                                     | Ion              | <i>m/z</i> (analytical) | <i>m/z</i> (calculated) | <i>m/z</i> difference [ppm] | RT [min] | DT [ms] | CCS-value [analytical, Å²] | CCS-value [LipidCCS database, Å²] | CCS-value [difference, %] | Main fragments [ <i>m/z</i> ] |
|--------------------------|-------------------|-------------------------------------------------|------------------|-------------------------|-------------------------|-----------------------------|----------|---------|----------------------------|-----------------------------------|---------------------------|-------------------------------|
| TAG (52:2) epoxidized    | ST3, LT2          | C <sub>55</sub> H <sub>100</sub> O <sub>7</sub> | +NH <sub>4</sub> | 890.7836                | 890.7807                | 3.29                        | 17.26    | 40.527  | 320.49                     | no entry                          | /                         | 873.7573                      |
|                          |                   |                                                 |                  |                         |                         |                             |          |         |                            |                                   |                           | 617.5151                      |
|                          |                   |                                                 |                  |                         |                         |                             |          |         |                            |                                   |                           | 603.537                       |
|                          |                   |                                                 |                  |                         |                         |                             |          |         |                            |                                   |                           | 591.5009                      |
|                          |                   |                                                 |                  |                         |                         |                             |          |         |                            |                                   |                           | 575.5053                      |
|                          |                   |                                                 |                  |                         |                         |                             |          |         |                            |                                   |                           | 339.29                        |
|                          |                   |                                                 |                  |                         |                         |                             |          |         |                            |                                   |                           | 313.274                       |
|                          |                   |                                                 |                  |                         |                         |                             |          |         |                            |                                   |                           | 491.3749                      |
| 477.3944                 |                   |                                                 |                  |                         |                         |                             |          |         |                            |                                   |                           |                               |
| TAG (52:2) epoxidized    | ST1, ST3, LT2     | C <sub>55</sub> H <sub>100</sub> O <sub>7</sub> | +NH <sub>4</sub> | 890.7838                | 890.7807                | 3.52                        | 16.26    | 40.546  | 320.64                     | no entry                          | /                         | 855.7471                      |
|                          |                   |                                                 |                  |                         |                         |                             |          |         |                            |                                   |                           | 603.5366                      |
|                          |                   |                                                 |                  |                         |                         |                             |          |         |                            |                                   |                           | 591.5001                      |
|                          |                   |                                                 |                  |                         |                         |                             |          |         |                            |                                   |                           | 573.4895                      |
|                          |                   |                                                 |                  |                         |                         |                             |          |         |                            |                                   |                           | 499.4512                      |
| TAG (52:1) epoxidized    | ST1, ST3          | C <sub>55</sub> H <sub>102</sub> O <sub>7</sub> | +NH <sub>4</sub> | 892.7996                | 892.7964                | 3.68                        | 18.96    | 40.680  | 321.7                      | no entry                          | /                         | 619.5325                      |
|                          |                   |                                                 |                  |                         |                         |                             |          |         |                            |                                   |                           | 601.5203                      |
|                          |                   |                                                 |                  |                         |                         |                             |          |         |                            |                                   |                           | 593.5161                      |
|                          |                   |                                                 |                  |                         |                         |                             |          |         |                            |                                   |                           | 577.5212                      |
|                          |                   |                                                 |                  |                         |                         |                             |          |         |                            |                                   |                           | 599.505                       |
|                          |                   |                                                 |                  |                         |                         |                             |          |         |                            |                                   |                           | 493.3899                      |
|                          |                   |                                                 |                  |                         |                         |                             |          |         |                            |                                   |                           | 477.3951                      |
|                          |                   |                                                 |                  |                         |                         |                             |          |         |                            |                                   |                           | 451.3794                      |
|                          |                   |                                                 |                  |                         |                         |                             |          |         |                            |                                   |                           | 339.2901                      |
| 337.274                  |                   |                                                 |                  |                         |                         |                             |          |         |                            |                                   |                           |                               |
| 313.2742                 |                   |                                                 |                  |                         |                         |                             |          |         |                            |                                   |                           |                               |
| 263.2372                 |                   |                                                 |                  |                         |                         |                             |          |         |                            |                                   |                           |                               |
| TAG (18:3/18:2/18:2) 8:2 | ST1, ST3          | C <sub>57</sub> H <sub>96</sub> O <sub>6</sub>  | +NH <sub>4</sub> | 894.7579                | 894.7545                | 3.86                        | 17.44    | 40.064  | 316.79                     | 318.5                             | 0.54                      | 877.7313                      |
|                          |                   |                                                 |                  |                         |                         |                             |          |         |                            |                                   |                           | 599.5028                      |
|                          |                   |                                                 |                  |                         |                         |                             |          |         |                            |                                   |                           | 597.4896                      |
|                          |                   |                                                 |                  |                         |                         |                             |          |         |                            |                                   |                           | 337.2726                      |
|                          |                   |                                                 |                  |                         |                         |                             |          |         |                            |                                   |                           | 335.2578                      |
| TAG (54:5) epoxidized    | ST1, ST3          | C <sub>57</sub> H <sub>98</sub> O <sub>7</sub>  | +H               | 895.7391                | 895.7385                | 0.63                        | 16.24    | 40.276  | 318.47                     | no entry                          | /                         | 615.5964                      |
|                          |                   |                                                 |                  |                         |                         |                             |          |         |                            |                                   |                           | 613.4791                      |
|                          |                   |                                                 |                  |                         |                         |                             |          |         |                            |                                   |                           | 293.2085                      |
| TAG (18:2/18:2/18:2) 8:2 | ST1, ST3          | C <sub>57</sub> H <sub>98</sub> O <sub>6</sub>  | +NH <sub>4</sub> | 896.7738                | 896.7702                | 4.14                        | 19.19    | 40.316  | 318.79                     | 319.3                             | 0.16                      | 879.7462                      |
|                          |                   |                                                 |                  |                         |                         |                             |          |         |                            |                                   |                           | 599.5052                      |
|                          |                   |                                                 |                  |                         |                         |                             |          |         |                            |                                   |                           | 337.274                       |
| TAG (54:4) epoxidized    | ST1, ST3, LT2     | C <sub>57</sub> H <sub>100</sub> O <sub>7</sub> | +H               | 897.7564                | 897.7542                | 2.47                        | 10.54    | 40.614  | 321.15                     | no entry                          | /                         | 879.745                       |
|                          |                   |                                                 |                  |                         |                         |                             |          |         |                            |                                   |                           | 617.5155                      |
|                          |                   |                                                 |                  |                         |                         |                             |          |         |                            |                                   |                           | 615.4998                      |
|                          |                   |                                                 |                  |                         |                         |                             |          |         |                            |                                   |                           | 601.5194                      |
|                          |                   |                                                 |                  |                         |                         |                             |          |         |                            |                                   |                           | 339.2898                      |



| Tentative metabolite        | Storage condition | Sum formula                                                      | Ion | <i>m/z</i> (analytical) | <i>m/z</i> (calculated) | <i>m/z</i> difference [ppm] | RT [min] | DT [ms] | CCS-value [analytical, Å²] | CCS-value [LipidCCS database, Å²] | CCS-value [difference, %] | Main fragments [ <i>m/z</i> ] |
|-----------------------------|-------------------|------------------------------------------------------------------|-----|-------------------------|-------------------------|-----------------------------|----------|---------|----------------------------|-----------------------------------|---------------------------|-------------------------------|
| TAG (18:1/18:2/18:2)        | ST1               | C <sub>57</sub> H <sub>100</sub> O <sub>6</sub> +NH <sub>4</sub> |     | 898.7911                | 898.7858                | 6                           | 20.99    | 40.674  | 321.62                     | 320.7                             | -0.29                     | 881.7639                      |
|                             |                   |                                                                  |     |                         |                         |                             |          |         |                            |                                   |                           | 601.5209                      |
|                             |                   |                                                                  |     |                         |                         |                             |          |         |                            |                                   |                           | 599.5057                      |
|                             |                   |                                                                  |     |                         |                         |                             |          |         |                            |                                   |                           | 339.2896                      |
|                             |                   |                                                                  |     |                         |                         |                             |          |         |                            |                                   |                           | 337.2741                      |
| TAG (18:2/18:2/20:5)        | ST1               | C <sub>59</sub> H <sub>96</sub> O <sub>6</sub> +H                |     | 901.7301                | 901.7338                | 2.37                        | 19.27    | 40.187  | 317.73                     | 321.3                             | 1.11                      | 621.4858                      |
|                             |                   |                                                                  |     |                         |                         |                             |          |         |                            |                                   |                           | 599.5038                      |
| TAG (53:2) epoxidized       | ST1, ST3          | C <sub>56</sub> H <sub>104</sub> O <sub>7</sub> +NH <sub>4</sub> |     | 906.8157                | 906.812                 | 4.13                        | 20.03    | 41.235  | 326.04                     | no entry                          | /                         | 889.788                       |
|                             |                   |                                                                  |     |                         |                         |                             |          |         |                            |                                   |                           | 871.7766                      |
|                             |                   |                                                                  |     |                         |                         |                             |          |         |                            |                                   |                           | 619.5312                      |
|                             |                   |                                                                  |     |                         |                         |                             |          |         |                            |                                   |                           | 607.5302                      |
|                             |                   |                                                                  |     |                         |                         |                             |          |         |                            |                                   |                           | 601.5202                      |
|                             |                   |                                                                  |     |                         |                         |                             |          |         |                            |                                   |                           | 591.5351                      |
|                             |                   |                                                                  |     |                         |                         |                             |          |         |                            |                                   |                           | 493.3889                      |
|                             |                   |                                                                  |     |                         |                         |                             |          |         |                            |                                   |                           | 477.3949                      |
|                             |                   |                                                                  |     |                         |                         |                             |          |         |                            |                                   |                           | 339.2897                      |
|                             |                   |                                                                  |     |                         |                         |                             |          |         |                            |                                   |                           | 337.2738                      |
| TAG (52:0) epoxidized twice | ST1, ST3, LT2     | C <sub>55</sub> H <sub>102</sub> O <sub>8</sub> +NH <sub>4</sub> |     | 908.7942                | 908.7913                | 3.26                        | 13.68    | 40.921  | 323.53                     | no entry                          | /                         | 891.7645                      |
|                             |                   |                                                                  |     |                         |                         |                             |          |         |                            |                                   |                           | 873.7533                      |
|                             |                   |                                                                  |     |                         |                         |                             |          |         |                            |                                   |                           | 635.5248                      |
|                             |                   |                                                                  |     |                         |                         |                             |          |         |                            |                                   |                           | 617.5142                      |
|                             |                   |                                                                  |     |                         |                         |                             |          |         |                            |                                   |                           | 593.5144                      |
|                             |                   |                                                                  |     |                         |                         |                             |          |         |                            |                                   |                           | 575.5033                      |
|                             |                   |                                                                  |     |                         |                         |                             |          |         |                            |                                   |                           | 509.3834                      |
|                             |                   |                                                                  |     |                         |                         |                             |          |         |                            |                                   |                           | 493.3884                      |
|                             |                   |                                                                  |     |                         |                         |                             |          |         |                            |                                   |                           | 467.3729                      |
|                             |                   |                                                                  |     |                         |                         |                             |          |         |                            |                                   |                           | 451.3779                      |
| TAG (54:6) epoxidized       | ST1               | C <sub>57</sub> H <sub>96</sub> O <sub>7</sub> +NH <sub>4</sub>  |     | 910.753                 | 910.7494                | 4                           | 12.54    | 40.195  | 317.74                     | no entry                          | /                         | 613.484                       |
|                             |                   |                                                                  |     |                         |                         |                             |          |         |                            |                                   |                           | 599.5043                      |
|                             |                   |                                                                  |     |                         |                         |                             |          |         |                            |                                   |                           | 595.4729                      |
|                             |                   |                                                                  |     |                         |                         |                             |          |         |                            |                                   |                           | 491.3727                      |
|                             |                   |                                                                  |     |                         |                         |                             |          |         |                            |                                   |                           | 337.2733                      |

| Tentative metabolite  | Storage condition | Sum formula                                                      | Ion | <i>m/z</i> (analytical) | <i>m/z</i> (calculated) | <i>m/z</i> difference [ppm] | RT [min] | DT [ms] | CCS-value [analytical, Å²] | CCS-value [LipidCCS database, Å²] | CCS-value [difference, %] | Main fragments [ <i>m/z</i> ] |
|-----------------------|-------------------|------------------------------------------------------------------|-----|-------------------------|-------------------------|-----------------------------|----------|---------|----------------------------|-----------------------------------|---------------------------|-------------------------------|
| TAG (54:4) epoxidized | ST1               | C <sub>57</sub> H <sub>100</sub> O <sub>7</sub> +NH <sub>4</sub> |     | 914.7839                | 914.7807                | 3.53                        | 15.95    | 40.756  | 322.19                     | no entry                          | /                         | 897.7588                      |
|                       |                   |                                                                  |     |                         |                         |                             |          |         |                            |                                   |                           | 881.7638                      |
|                       |                   |                                                                  |     |                         |                         |                             |          |         |                            |                                   |                           | 617.5155                      |
|                       |                   |                                                                  |     |                         |                         |                             |          |         |                            |                                   |                           | 615.5007                      |
|                       |                   |                                                                  |     |                         |                         |                             |          |         |                            |                                   |                           | 601.5225                      |
|                       |                   |                                                                  |     |                         |                         |                             |          |         |                            |                                   |                           | 599.5039                      |
|                       |                   |                                                                  |     |                         |                         |                             |          |         |                            |                                   |                           | 597.4887                      |
|                       |                   |                                                                  |     |                         |                         |                             |          |         |                            |                                   |                           | 491.3743                      |
|                       |                   |                                                                  |     |                         |                         |                             |          |         |                            |                                   |                           | 339.2901                      |
| 261.222               |                   |                                                                  |     |                         |                         |                             |          |         |                            |                                   |                           |                               |
| TAG (54:3) epoxidized | LT1, LT2          | C <sub>57</sub> H <sub>102</sub> O <sub>7</sub> +NH <sub>4</sub> |     | 916.7984                | 916.7964                | 2.25                        | 15.43    | 41.107  | 324.97                     | no entry                          | /                         | 881.7641                      |
|                       |                   |                                                                  |     |                         |                         |                             |          |         |                            |                                   |                           | 617.5148                      |
|                       |                   |                                                                  |     |                         |                         |                             |          |         |                            |                                   |                           | 603.5364                      |
|                       |                   |                                                                  |     |                         |                         |                             |          |         |                            |                                   |                           | 599.506                       |
|                       |                   |                                                                  |     |                         |                         |                             |          |         |                            |                                   |                           | 339.2905                      |
|                       |                   |                                                                  |     |                         |                         |                             |          |         |                            |                                   |                           | 261.222                       |
| TAG (54:3) epoxidized | ST1, ST3          | C <sub>57</sub> H <sub>102</sub> O <sub>7</sub> +NH <sub>4</sub> |     | 916.7992                | 916.7964                | 3.14                        | 14.62    | 40.707  | 321.79                     | no entry                          | /                         | 899.7704                      |
|                       |                   |                                                                  |     |                         |                         |                             |          |         |                            |                                   |                           | 881.7619                      |
|                       |                   |                                                                  |     |                         |                         |                             |          |         |                            |                                   |                           | 617.5129                      |
|                       |                   |                                                                  |     |                         |                         |                             |          |         |                            |                                   |                           | 601.5199                      |
|                       |                   |                                                                  |     |                         |                         |                             |          |         |                            |                                   |                           | 599.5034                      |
|                       |                   |                                                                  |     |                         |                         |                             |          |         |                            |                                   |                           | 339.2903                      |
|                       |                   |                                                                  |     |                         |                         |                             |          |         |                            |                                   |                           | 337.2727                      |
| 261.2218              |                   |                                                                  |     |                         |                         |                             |          |         |                            |                                   |                           |                               |
| TAG (54:3) epoxidized | ST1, ST3          | C <sub>57</sub> H <sub>102</sub> O <sub>7</sub> +NH <sub>4</sub> |     | 916.7997                | 916.7964                | 3.69                        | 17.33    | 41.113  | 325.02                     | no entry                          | /                         | 899.773                       |
|                       |                   |                                                                  |     |                         |                         |                             |          |         |                            |                                   |                           | 619.5305                      |
|                       |                   |                                                                  |     |                         |                         |                             |          |         |                            |                                   |                           | 617.5159                      |
|                       |                   |                                                                  |     |                         |                         |                             |          |         |                            |                                   |                           | 601.5212                      |
|                       |                   |                                                                  |     |                         |                         |                             |          |         |                            |                                   |                           | 599.5047                      |
|                       |                   |                                                                  |     |                         |                         |                             |          |         |                            |                                   |                           | 493.3891                      |
|                       |                   |                                                                  |     |                         |                         |                             |          |         |                            |                                   |                           | 491.374                       |
|                       |                   |                                                                  |     |                         |                         |                             |          |         |                            |                                   |                           | 477.3944                      |
| 475.379               |                   |                                                                  |     |                         |                         |                             |          |         |                            |                                   |                           |                               |
| TAG (54:2) epoxidized | ST1, ST3          | C <sub>57</sub> H <sub>104</sub> O <sub>7</sub> +NH <sub>4</sub> |     | 918.8159                | 918.812                 | 4.29                        | 19.11    | 41.498  | 328.07                     | no entry                          | /                         | 901.7896                      |
|                       |                   |                                                                  |     |                         |                         |                             |          |         |                            |                                   |                           | 883.779                       |
|                       |                   |                                                                  |     |                         |                         |                             |          |         |                            |                                   |                           | 619.5324                      |
|                       |                   |                                                                  |     |                         |                         |                             |          |         |                            |                                   |                           | 603.5371                      |
|                       |                   |                                                                  |     |                         |                         |                             |          |         |                            |                                   |                           | 601.5197                      |
|                       |                   |                                                                  |     |                         |                         |                             |          |         |                            |                                   |                           | 493.3905                      |
| 477.3956              |                   |                                                                  |     |                         |                         |                             |          |         |                            |                                   |                           |                               |

| Tentative metabolite         | Storage condition | Sum formula                                     | Ion              | <i>m/z</i> (analytical) | <i>m/z</i> (calculated) | <i>m/z</i> difference [ppm] | RT [min] | DT [ms] | CCS-value [analytical, Å²] | CCS-value [LipidCCS database, Å²] | CCS-value [difference, %] | Main fragments [ <i>m/z</i> ] |
|------------------------------|-------------------|-------------------------------------------------|------------------|-------------------------|-------------------------|-----------------------------|----------|---------|----------------------------|-----------------------------------|---------------------------|-------------------------------|
| TAG (54:1) epoxidized        | ST1, ST3          | C <sub>57</sub> H <sub>106</sub> O <sub>7</sub> | +NH <sub>4</sub> | 920.8307                | 920.8277                | 3.34                        | 21.07    | 41.840  | 330.78                     | no entry                          | /                         | 903.8044                      |
|                              |                   |                                                 |                  |                         |                         |                             |          |         |                            |                                   |                           | 885.7931                      |
|                              |                   |                                                 |                  |                         |                         |                             |          |         |                            |                                   |                           | 621.546                       |
|                              |                   |                                                 |                  |                         |                         |                             |          |         |                            |                                   |                           | 619.5316                      |
|                              |                   |                                                 |                  |                         |                         |                             |          |         |                            |                                   |                           | 605.5529                      |
|                              |                   |                                                 |                  |                         |                         |                             |          |         |                            |                                   |                           | 601.5199                      |
|                              |                   |                                                 |                  |                         |                         |                             |          |         |                            |                                   |                           | 493.3895                      |
| TAG (54:5) epoxidized twice  | ST1               | C <sub>57</sub> H <sub>96</sub> O <sub>8</sub>  | +NH <sub>4</sub> | 926.7466                | 926.7433                | 2.48                        | 8.89     | 40.345  | 318.85                     | no entry                          | /                         | 477.3946                      |
|                              |                   |                                                 |                  |                         |                         |                             |          |         |                            |                                   |                           | 629.4783                      |
|                              |                   |                                                 |                  |                         |                         |                             |          |         |                            |                                   |                           | 615.4966                      |
|                              |                   |                                                 |                  |                         |                         |                             |          |         |                            |                                   |                           | 613.4813                      |
|                              |                   |                                                 |                  |                         |                         |                             |          |         |                            |                                   |                           | 597.4893                      |
| TAG (54:4) epoxidized twice  | ST1               | C <sub>57</sub> H <sub>98</sub> O <sub>8</sub>  | +NH <sub>4</sub> | 928.7623                | 928.76                  | 2.53                        | 9.98     | 40.593  | 320.82                     | no entry                          | /                         | 595.4705                      |
|                              |                   |                                                 |                  |                         |                         |                             |          |         |                            |                                   |                           | 893.7264                      |
|                              |                   |                                                 |                  |                         |                         |                             |          |         |                            |                                   |                           | 631.4945                      |
|                              |                   |                                                 |                  |                         |                         |                             |          |         |                            |                                   |                           | 615.5003                      |
|                              |                   |                                                 |                  |                         |                         |                             |          |         |                            |                                   |                           | 613.4841                      |
| TAG (54:2) epoxidized twice  | ST1               | C <sub>57</sub> H <sub>102</sub> O <sub>8</sub> | +NH <sub>4</sub> | 932.7945                | 932.7913                | 3.5                         | 12.49    | 41.238  | 325.92                     | no entry                          | /                         | 599.5054                      |
|                              |                   |                                                 |                  |                         |                         |                             |          |         |                            |                                   |                           | 491.3742                      |
|                              |                   |                                                 |                  |                         |                         |                             |          |         |                            |                                   |                           | 337.2746                      |
|                              |                   |                                                 |                  |                         |                         |                             |          |         |                            |                                   |                           | 915.7696                      |
|                              |                   |                                                 |                  |                         |                         |                             |          |         |                            |                                   |                           | 897.7572                      |
|                              |                   |                                                 |                  |                         |                         |                             |          |         |                            |                                   |                           | 633.5098                      |
| TAG (54:1) epoxidized twice  | ST1               | C <sub>57</sub> H <sub>102</sub> O <sub>8</sub> | +NH <sub>4</sub> | 932.7945                | 932.7913                | 3.5                         | 12.49    | 41.238  | 325.92                     | no entry                          | /                         | 615.5                         |
|                              |                   |                                                 |                  |                         |                         |                             |          |         |                            |                                   |                           | 603.5363                      |
|                              |                   |                                                 |                  |                         |                         |                             |          |         |                            |                                   |                           | 491.3737                      |
|                              |                   |                                                 |                  |                         |                         |                             |          |         |                            |                                   |                           | 339.2884                      |
|                              |                   |                                                 |                  |                         |                         |                             |          |         |                            |                                   |                           | 277.2164                      |
|                              |                   |                                                 |                  |                         |                         |                             |          |         |                            |                                   |                           | 915.7696                      |
| TAG (54:1) epoxidized twice  | ST3               | C <sub>57</sub> H <sub>104</sub> O <sub>8</sub> | +NH <sub>4</sub> | 934.8096                | 934.8069                | 2.9                         | 15.12    | 41.438  | 327.51                     | no entry                          | /                         | 897.7572                      |
|                              |                   |                                                 |                  |                         |                         |                             |          |         |                            |                                   |                           | 635.5244                      |
|                              |                   |                                                 |                  |                         |                         |                             |          |         |                            |                                   |                           | 619.5267                      |
|                              |                   |                                                 |                  |                         |                         |                             |          |         |                            |                                   |                           | 617.5128                      |
|                              |                   |                                                 |                  |                         |                         |                             |          |         |                            |                                   |                           | 603.5337                      |
|                              |                   |                                                 |                  |                         |                         |                             |          |         |                            |                                   |                           | 509.3846                      |
|                              |                   |                                                 |                  |                         |                         |                             |          |         |                            |                                   |                           | 493.3878                      |
| TAG (54:2) epoxidized thrice | ST1               | C <sub>57</sub> H <sub>100</sub> O <sub>9</sub> | +NH <sub>4</sub> | 946.7732                | 946.7706                | 2.84                        | 7.74     | 40.878  | 323                        | no entry                          | /                         | 479.3731                      |
|                              |                   |                                                 |                  |                         |                         |                             |          |         |                            |                                   |                           | 339.2889                      |
|                              |                   |                                                 |                  |                         |                         |                             |          |         |                            |                                   |                           | 929.7463                      |
|                              |                   |                                                 |                  |                         |                         |                             |          |         |                            |                                   |                           | 911.7361                      |
|                              |                   |                                                 |                  |                         |                         |                             |          |         |                            |                                   |                           | 633.5109                      |
|                              |                   |                                                 |                  |                         |                         |                             |          |         |                            |                                   |                           | 631.4954                      |
|                              |                   |                                                 |                  |                         |                         |                             |          |         |                            |                                   |                           | 617.5127                      |
| TAG (54:2) epoxidized thrice | ST1               | C <sub>57</sub> H <sub>100</sub> O <sub>9</sub> | +NH <sub>4</sub> | 946.7732                | 946.7706                | 2.84                        | 7.74     | 40.878  | 323                        | no entry                          | /                         | 615.4996                      |
|                              |                   |                                                 |                  |                         |                         |                             |          |         |                            |                                   |                           | 599.5055                      |
|                              |                   |                                                 |                  |                         |                         |                             |          |         |                            |                                   |                           | 491.3748                      |

| Tentative metabolite         | Storage condition | Sum formula                                                      | Ion | <i>m/z</i> (analytical) | <i>m/z</i> (calculated) | <i>m/z</i> difference [ppm] | RT [min] | DT [ms] | CCS-value [analytical, Å²] | CCS-value [LipidCCS database, Å²] | CCS-value [difference, %] | Main fragments [ <i>m/z</i> ] |
|------------------------------|-------------------|------------------------------------------------------------------|-----|-------------------------|-------------------------|-----------------------------|----------|---------|----------------------------|-----------------------------------|---------------------------|-------------------------------|
| TAG (56:2) epoxidized        | ST1, ST3          | C <sub>59</sub> H <sub>108</sub> O <sub>7</sub> +NH <sub>4</sub> |     | 946.8462                | 946.8433                | 3.09                        | 20.57    | 42.088  | 332.61                     | no entry                          | /                         | 647.5634                      |
|                              |                   |                                                                  |     |                         |                         |                             |          |         |                            |                                   |                           | 629.5537                      |
|                              |                   |                                                                  |     |                         |                         |                             |          |         |                            |                                   |                           | 603.5367                      |
|                              |                   |                                                                  |     |                         |                         |                             |          |         |                            |                                   |                           | 505.4268                      |
| TAG (54:1) epoxidized thrice | ST1, LT2          | C <sub>57</sub> H <sub>102</sub> O <sub>9</sub> +NH <sub>4</sub> |     | 948.789                 | 948.7862                | 3                           | 8.51     | 41.130  | 324.99                     | no entry                          | /                         | 633.511                       |
|                              |                   |                                                                  |     |                         |                         |                             |          |         |                            |                                   |                           | 617.5126                      |
|                              |                   |                                                                  |     |                         |                         |                             |          |         |                            |                                   |                           | 615.5011                      |
|                              |                   |                                                                  |     |                         |                         |                             |          |         |                            |                                   |                           | 599.504                       |
| TAG (54:0) epoxidized thrice | ST1, ST3, LT2     | C <sub>57</sub> H <sub>104</sub> O <sub>9</sub> +NH <sub>4</sub> |     | 950.8034                | 950.8019                | 1.65                        | 9.39     | 41.210  | 325.61                     | no entry                          | /                         | 635.5253                      |
|                              |                   |                                                                  |     |                         |                         |                             |          |         |                            |                                   |                           | 933.776                       |
|                              |                   |                                                                  |     |                         |                         |                             |          |         |                            |                                   |                           | 617.5144                      |
|                              |                   |                                                                  |     |                         |                         |                             |          |         |                            |                                   |                           | 599.5033                      |
|                              |                   |                                                                  |     |                         |                         |                             |          |         |                            |                                   |                           | 509.3838                      |
| DGDG (18:2/18:2)             | ST1               | C <sub>51</sub> H <sub>88</sub> O <sub>15</sub> +Na              |     | 963.6044                | 963.6015                | 3.04                        | 6.03     | 39.374  | 310.96                     | no entry                          | /                         | 493.3894                      |
|                              |                   |                                                                  |     |                         |                         |                             |          |         |                            |                                   |                           | 801.551                       |
|                              |                   |                                                                  |     |                         |                         |                             |          |         |                            |                                   |                           | 683.3613                      |
|                              |                   |                                                                  |     |                         |                         |                             |          |         |                            |                                   |                           | 521.3087                      |
| DGDG (18:1/18:2)             | ST1               | C <sub>51</sub> H <sub>90</sub> O <sub>15</sub> +Na              |     | 965.6202                | 965.6172                | 3.19                        | 6.74     | 39.614  | 312.86                     | no entry                          | /                         | 803.5631                      |
|                              |                   |                                                                  |     |                         |                         |                             |          |         |                            |                                   |                           | 685.3791                      |
|                              |                   |                                                                  |     |                         |                         |                             |          |         |                            |                                   |                           | 683.3616                      |
|                              |                   |                                                                  |     |                         |                         |                             |          |         |                            |                                   |                           | 523.3236                      |
|                              |                   |                                                                  |     |                         |                         |                             |          |         |                            |                                   |                           | 521.3058                      |
| DGDG (18:1/18:1)             | ST1               | C <sub>51</sub> H <sub>92</sub> O <sub>15</sub> +Na              |     | 967.6361                | 967.6328                | 3.45                        | 7.64     | 39.857  | 314.78                     | no entry                          | /                         | 805.5795                      |
|                              |                   |                                                                  |     |                         |                         |                             |          |         |                            |                                   |                           | 685.3767                      |
|                              |                   |                                                                  |     |                         |                         |                             |          |         |                            |                                   |                           | 523.3228                      |

**Table S5:** Results from the determination of antioxidant capacity (AOA) with the TEAC, ORAC, and FOLIN-CIOCALTEU (FC) assays. The storage durations of accelerated short-term storage were summarized as follows: short (day 2, day 4, week 2), mid (week 6, week 10, week 12), and long (week 16, week 20, week 24). The storage periods of realistic long-term storage were summarized as follows: short (month 3, month 6), mid (month 9, month 12), and long (month 15, month 18).

|             |         | TEAC (mmol TAE/100 g)  |                        |                        | ORAC (mmol TAE/100 g)  |                        |                        | FC (mmol GAE/100 g)    |                        |                        |
|-------------|---------|------------------------|------------------------|------------------------|------------------------|------------------------|------------------------|------------------------|------------------------|------------------------|
| Pre-store d | AO A    | 5.85 ± 1.93            |                        |                        | 4.04 ± 2.13            |                        |                        | 3.24 ± 1.05            |                        |                        |
|             |         | short                  | mid                    | long                   | short                  | Mid                    | long                   | short                  | mid                    | long                   |
| ST1         | AO A    | 5.60 ± 1.49            | 5.07 ± 1.52            | 4.01 ± 1.23            | 3.41 ± 1.25            | 3.50 ± 0.92            | 3.00 ± 1.30            | 2.63 ± 0.62            | 2.41 ± 0.60            | 1.97 ± 0.44            |
|             | p-value | 7.43×10 <sup>-01</sup> | 3.21×10 <sup>-01</sup> | 1.19×10 <sup>-02</sup> | 4.35×10 <sup>-01</sup> | 4.54×10 <sup>-01</sup> | 1.59×10 <sup>-01</sup> | 9.43×10 <sup>-02</sup> | 2.26×10 <sup>-02</sup> | 3.24×10 <sup>-04</sup> |
| ST2         | AO A    | 5.51 ± 1.15            | 5.25 ± 1.30            | 5.40 ± 1.71            | 3.15 ± 1.01            | 3.33 ± 0.82            | 3.78 ± 1.14            | 2.70 ± 0.52            | 2.36 ± 0.50            | 2.62 ± 0.78            |
|             | p-value | 6.06×10 <sup>-01</sup> | 3.98×10 <sup>-01</sup> | 5.93×10 <sup>-01</sup> | 2.34×10 <sup>-01</sup> | 3.12×10 <sup>-01</sup> | 7.01×10 <sup>-01</sup> | 1.02×10 <sup>-01</sup> | 1.01×10 <sup>-02</sup> | 1.32×10 <sup>-01</sup> |
| ST3         | AO A    | 5.93 ± 1.43            | 5.36 ± 1.43            | 4.56 ± 1.30            | 3.70 ± 1.29            | 4.01 ± 1.13            | 3.25 ± 0.96            | 2.50 ± 0.50            | 2.49 ± 0.72            | 2.09 ± 0.48            |
|             | p-value | 9.10×10 <sup>-01</sup> | 5.17×10 <sup>-01</sup> | 7.77×10 <sup>-02</sup> | 6.69×10 <sup>-01</sup> | 9.64×10 <sup>-01</sup> | 2.13×10 <sup>-01</sup> | 2.73×10 <sup>-02</sup> | 6.24×10 <sup>-02</sup> | 1.11×10 <sup>-03</sup> |
| LT1         | AO A    | 5.78 ± 1.97            | 5.32 ± 1.57            | 5.33 ± 1.01            | 3.13 ± 1.08            | 3.81 ± 1.56            | 3.45 ± 0.89            | 2.83 ± 0.51            | 2.65 ± 0.50            | 2.77 ± 0.60            |
|             | p-value | 9.50×10 <sup>-01</sup> | 5.42×10 <sup>-01</sup> | 4.62×10 <sup>-01</sup> | 2.37×10 <sup>-01</sup> | 4.11×10 <sup>-01</sup> | 7.94×10 <sup>-01</sup> | 2.67×10 <sup>-01</sup> | 1.18×10 <sup>-01</sup> | 2.39×10 <sup>-01</sup> |
| LT2         | AO A    | 5.84 ± 1.19            | 5.26 ± 1.21            | 4.12 ± 1.21            | 3.62 ± 1.13            | 3.09 ± 1.14            | 3.21 ± 0.79            | 2.77 ± 0.57            | 2.48 ± 0.51            | 2.64 ± 0.61            |
|             | p-value | 9.89×10 <sup>-01</sup> | 4.39×10 <sup>-01</sup> | 3.26×10 <sup>-02</sup> | 5.80×10 <sup>-01</sup> | 2.28×10 <sup>-01</sup> | 2.35×10 <sup>-01</sup> | 2.24×10 <sup>-01</sup> | 5.09×10 <sup>-02</sup> | 1.40×10 <sup>-01</sup> |
